# Supplementary material
Source: PubMed Central journal article supplement (PMC3197170)

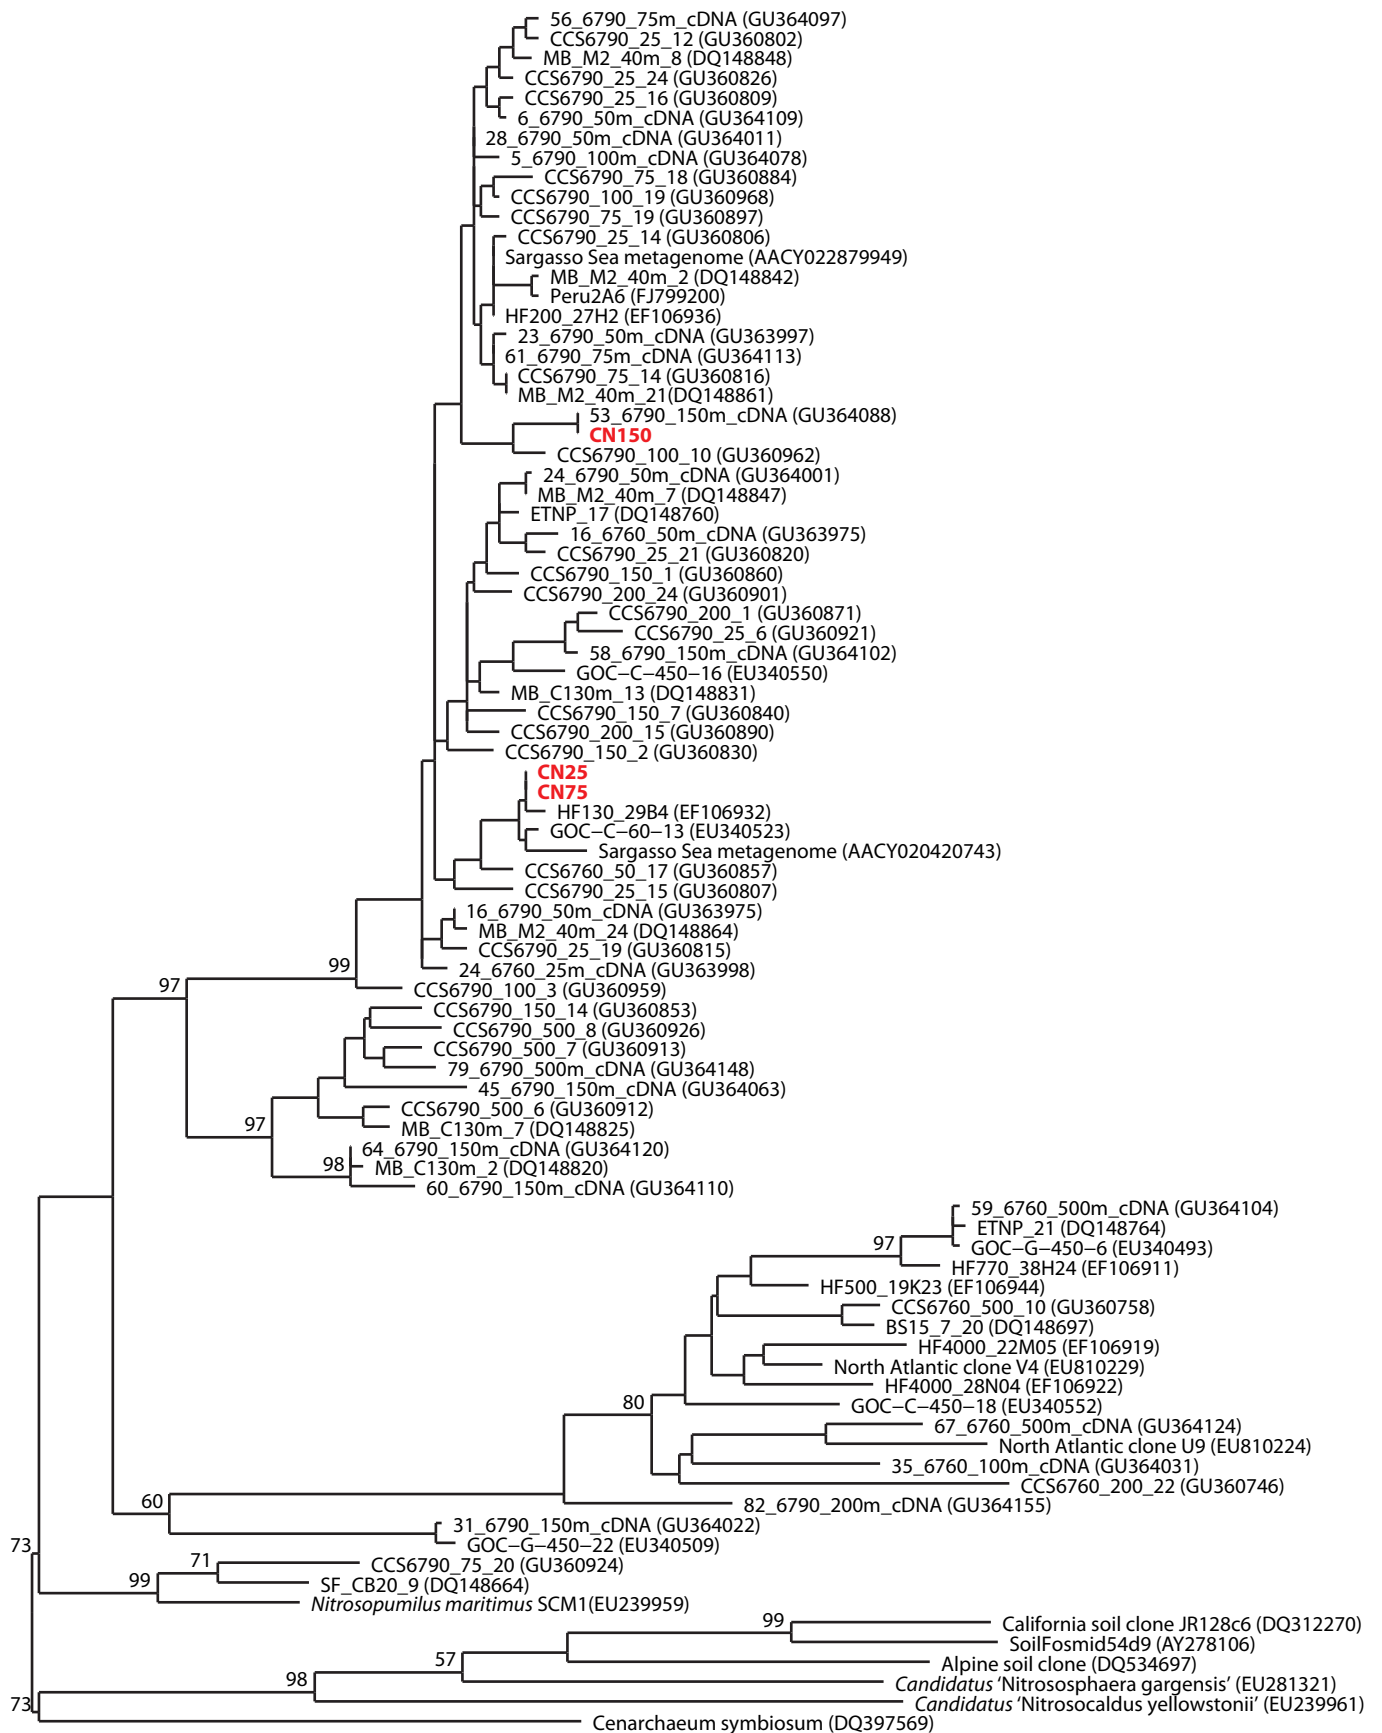

Supplement: ismej201158x1.pdf [file ismej201158x1.pdf]
